# Supplementary material
Source: PubMed Central journal article supplement (PMC3320190)
Supplement: supp_pp.111.192310_192310Supplemental_data.pdf [file supp_pp.111.192310_192310Supplemental_data.pdf]

## Figure S1 Nie *et al*

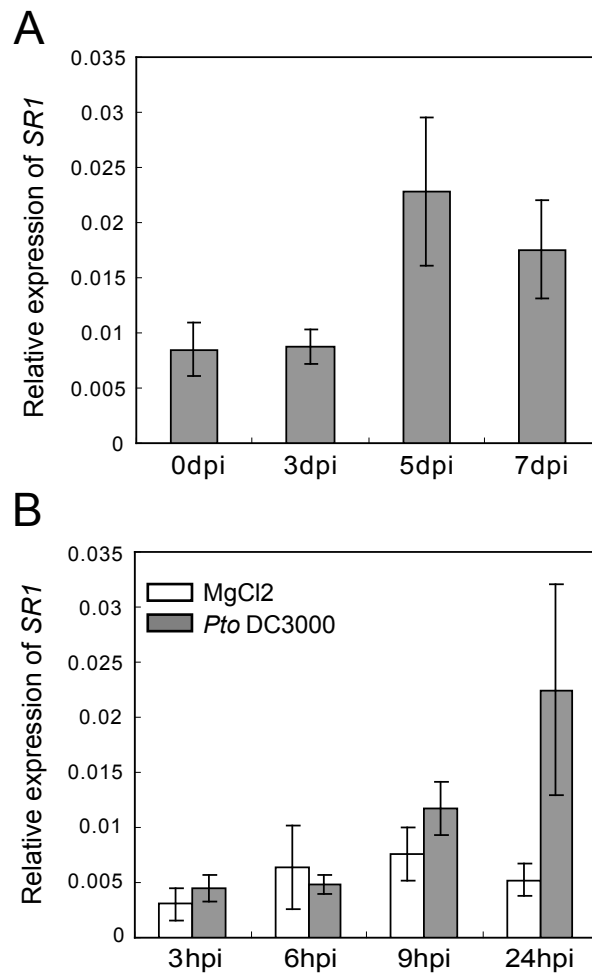

**Supplemental Figure 1.** *SR1* was induced by powdery mildew and *Pto* DC3000

Four-week-old plants were inoculated with *G. cichoracearum* or *Pto* DC3000. The relative expression of *SR1* was examined at various time points.

A. *G. cichoracearum*

B. *Pto* DC3000

The bars represent the mean and standard deviation of values from three independent experiments.

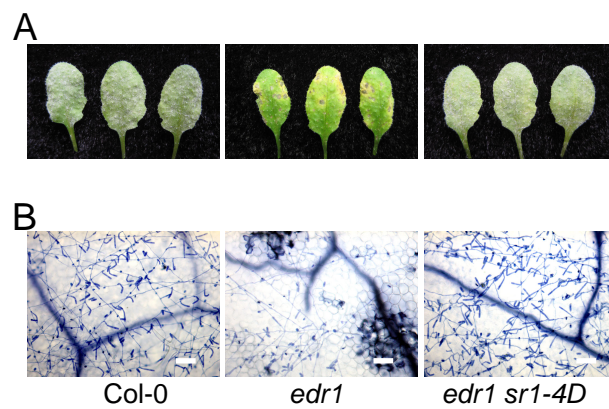

**Supplemental Figure 2.** *sr1-4D* suppressed *edr1*-mediated powdery mildew resistance  
Four-week-old plants were infected with *G. cichoracearum*.

A. The representative leaves were removed and photographed at 8 dpi.

B. Infected leaves were stained with trypan blue to visualize fungal growth and plant cell death. Bar = 100  $\mu$ m.

Figure S3 Nie *et al*

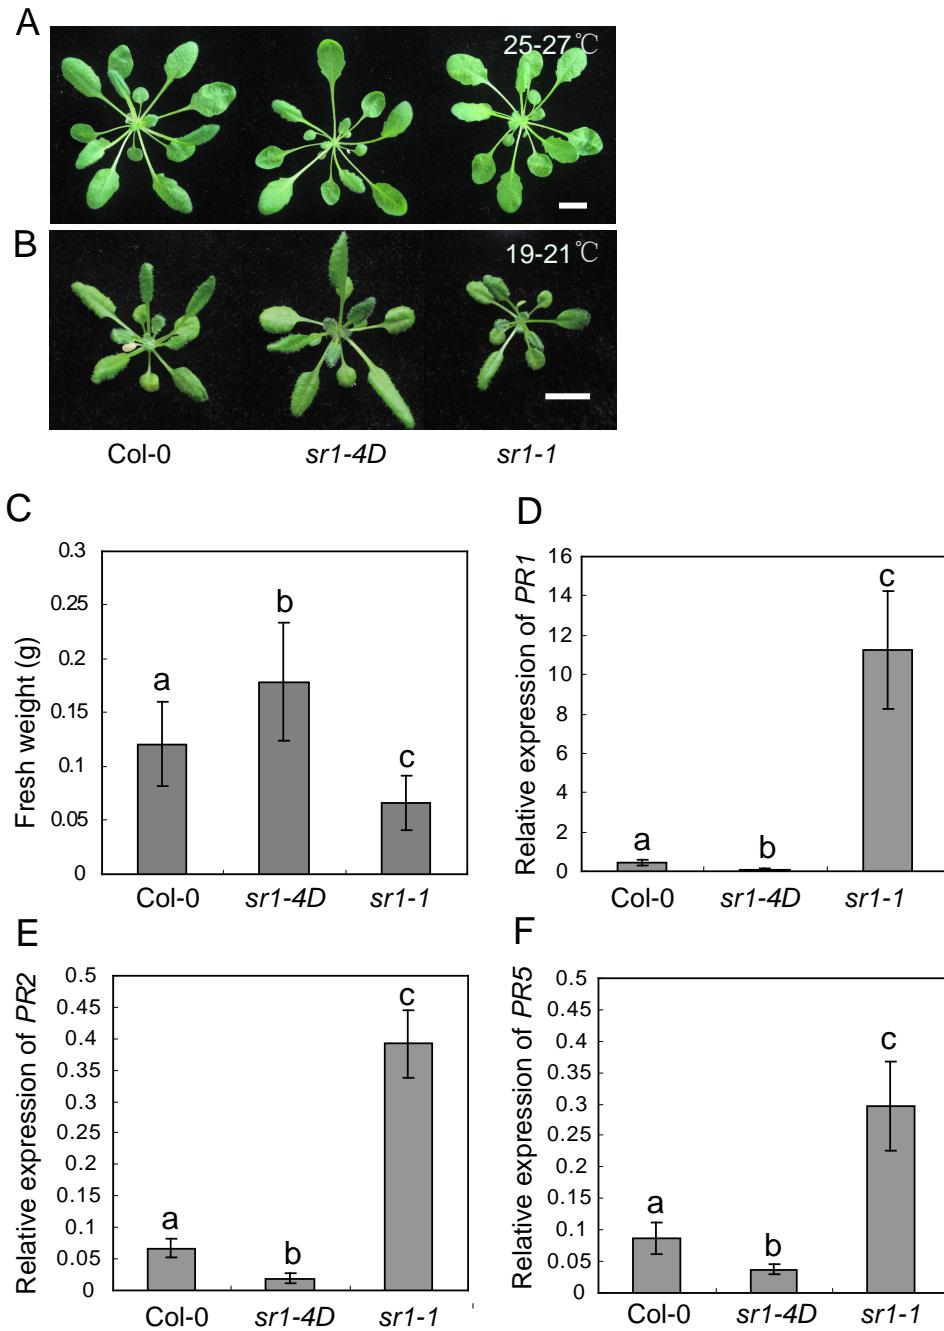

**Supplemental Figure 3.** Temperature dependent growth phenotype of *sr1-4D*

A-B. Wild type, *sr1-4D* and *sr1-1* plants were grown at 25-27°C (A) or 19-21°C (B) for 4-5 weeks. Bar=1cm

C. Fresh weight of five-week-old plants grown at 19-21°C. The bars represent mean and standard deviation of samples (n=12).

D-F. Relative expression of defense related genes *PR1* (D), *PR2* (E) and *PR5* (F) in 4-5 week old plants grown at 19-21°C. The bars represent the mean and standard deviation of values from three independent experiments. In C-F, low-case letters indicate statistical significance ( $p < 0.01$ , t-test).

Figure S4 Nie et al

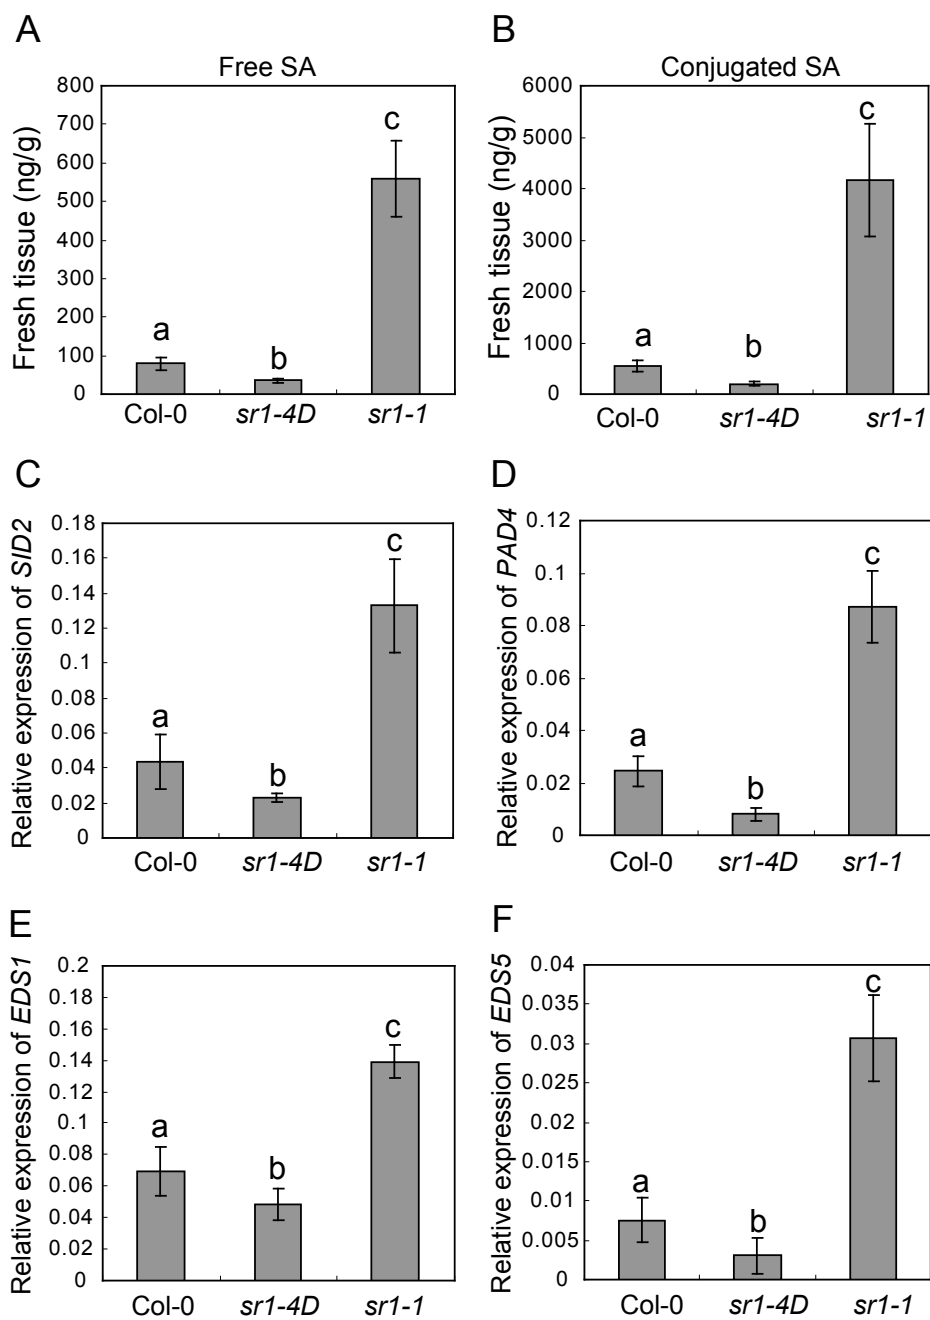

**Supplemental Figure 4. SA accumulation of *sr1-4D*.**

A-B. Accumulation of free (A) and Conjugated (B) SA in five-week-old plants grown at 19-21°C.

C-F. Relative expression of *SID2* (C), *PAD4* (D), *EDS1* (E) and *EDS5* (F) in 4-5 week old plants grown at 19-21°C.

The bars represent mean and standard deviation of three independent biological samples. Low-case letters indicate statistical significance ( $p < 0.01$ , t-test).

Figure S5

Nie *et al*

TTATGTAAATAAATGGAATAAGATTCAGTTTTCTGTTATGGGACATCCCTC  
GTTAATTCTTGTTTTGGTTCTTTTTGATAACCCAAAGTTTATATAGGTTTTT  
TTTTAATTTATCTTCTTACGTCCATTAATTTGTTTTTGTGTTTGTATGTATTT  
GGCTAAACGCGTGTGTGCGTGTGTGTCCTACTGAGTCGTCTCTTTTGAG  
-141 -137  
TCAACTTGAAATATCAACCAATCAGCAAACCAAATCTTATAACATCATCT  
TCTTCATCTTTCCGACAAAAATACCAAATTCTTGAAAACAAAAAAAATG  
0

**Supplemental Figure 5.** The *NDR1* promoter sequence contains a CGCG box

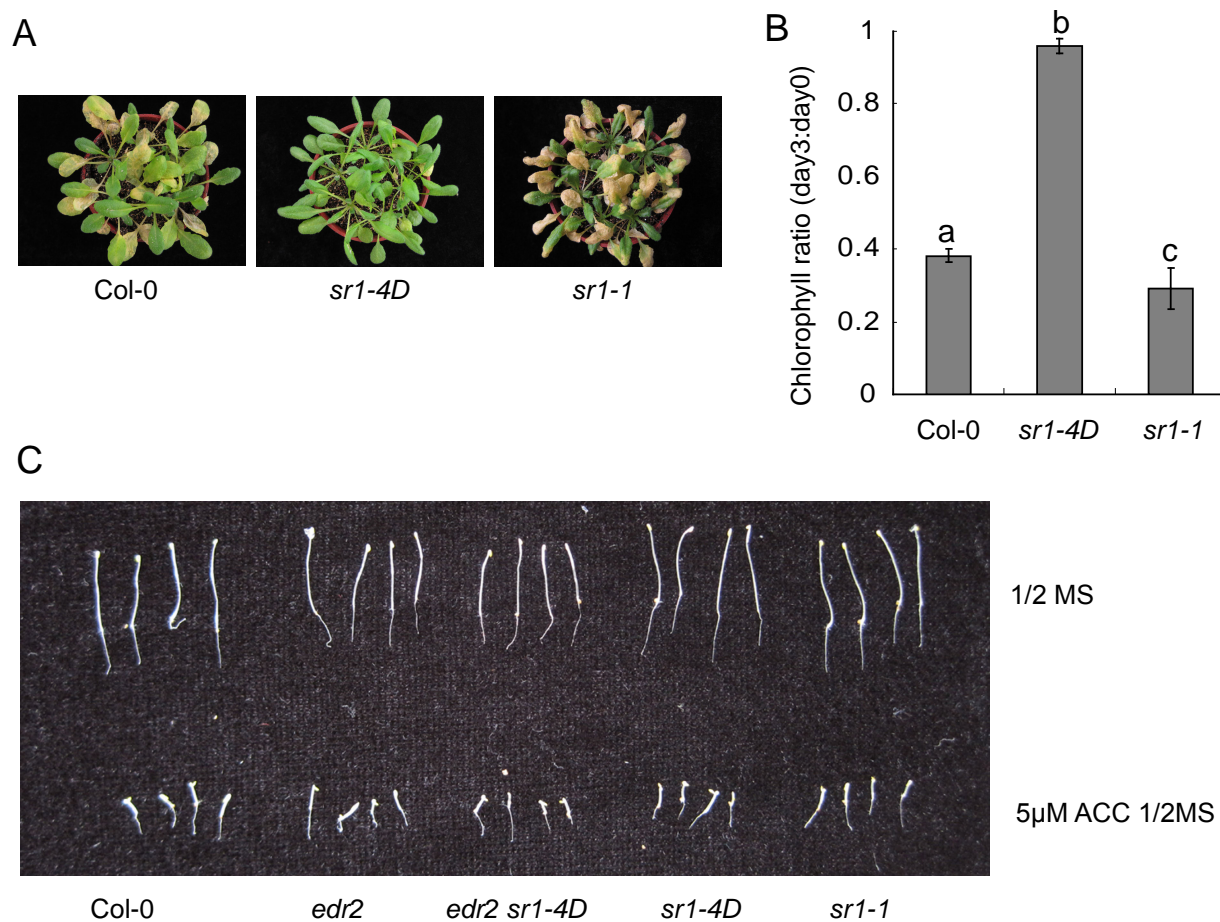

**Supplemental Figure 6.** SR1 is involved in ethylene induced senescence, but is not involved in ACC induced triple response.

- A. Four-week-old plants were treated with  $100 \mu\text{l l}^{-1}$  ethylene for 3 days.
- B. Chlorophyll ratio of day 3 over day 0, for the fourth to the sixth leaves treated with  $100 \mu\text{l l}^{-1}$  ethylene. The bars represent mean and standard deviation of values from samples. Statistical differences are indicated with lower-case letters ( $n=4$ ,  $P<0.01$ , one-way ANOVA). The experiment was repeated 3 times with similar results.
- C. The wild type, *edr2*, *edr2 sr1-4D*, *sr1-4D* and *sr1-1* seeds were plated on 1/2 MS medium with  $5\mu\text{M ACC}$  for 4 days in dark.

Figure S7 Nie *et al*

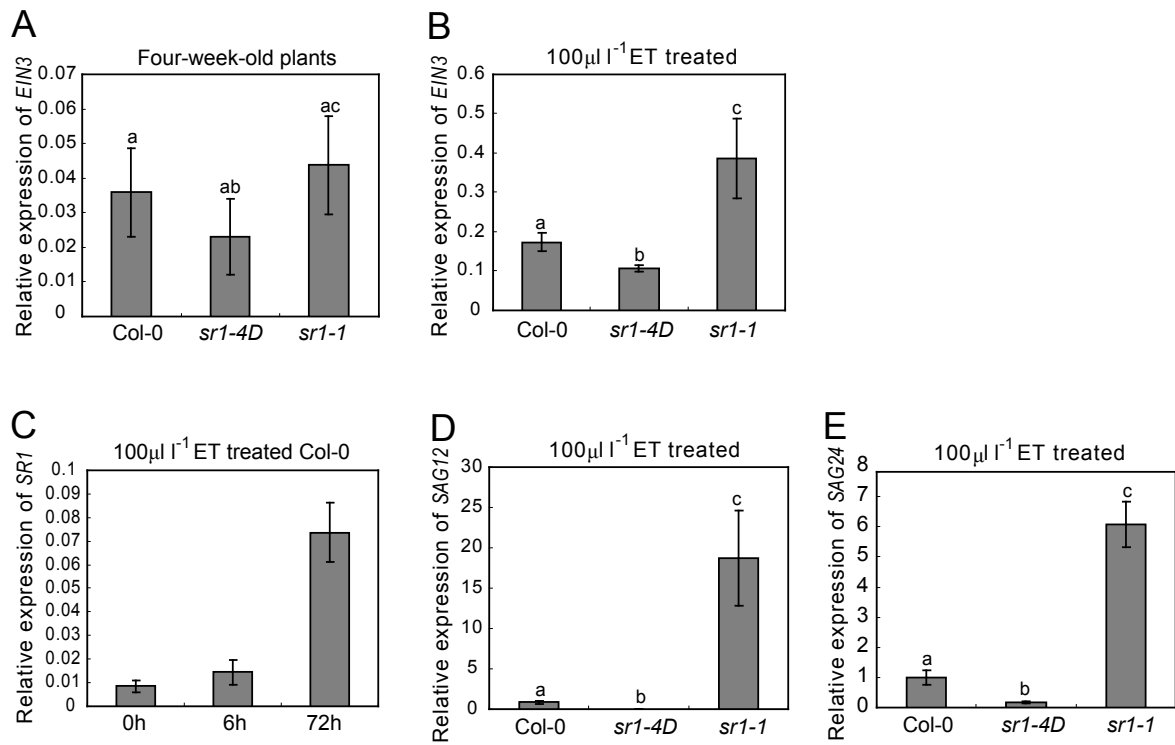

**Supplemental Figure 7.** Relative expression of several defense and senescence related genes.

A-B. Relative expression of *EIN3* in four-week-old plants. (A) Untreated plants (B) Plants treated with 100  $\mu\text{l l}^{-1}$  ethylene for 3 days. The bars represent mean and standard deviation from three biological replicates. Low-case letters indicate statistical significance ( $p < 0.01$ , t-test).

C. Relative expression of *SR1* in wild type before and after ethylene treatment (at 0h, 6h and 72h).

D-E. Relative expression of *SAG12* (D) and *SAG24* (E) in four-week-old plants treated with 100  $\mu\text{l l}^{-1}$  ethylene for 3 days. The bars represent mean and standard deviation from three biological replicates. Low-case letters indicate statistical significance ( $p < 0.01$ , t-test).

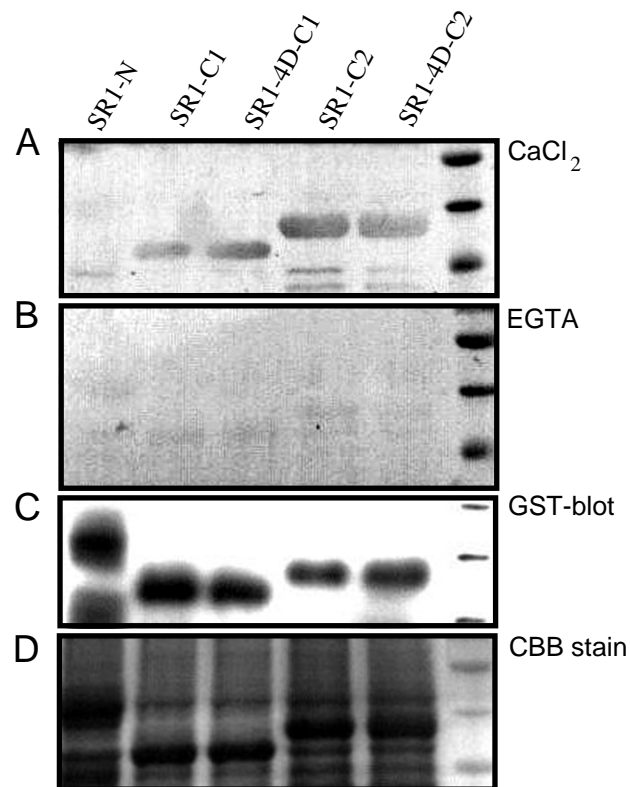

**Supplemental Figure 8.** Calcium is needed for SR1-4D binding to the calmodulin *in vitro*. (An animal version of calmodulin was used in the experiments)

- A. Calmodulin binding assay performed in the presence of 1mM  $\text{CaCl}_2$ .
  - B. Calmodulin binding assay performed in the presence of 5mM EGTA
  - C. Immunoblot with GST antibody showing the correct size of the expressed protein.
  - D. Coomassie brilliant blue (CBB) staining showed the equal loading of each sample.
- SR1-C1-GST: Truncated SR1 protein (801aa-900aa)  
 SR1-C2-GST: Truncated SR1 protein (801aa-930aa)  
 SR1-4D-C1-GST : Truncated SR1-4D protein (801aa-900aa)  
 SR1-4D-C2-GST: Truncated SR1-4D protein (801aa-930aa)



Figure S9

Nie *et al*

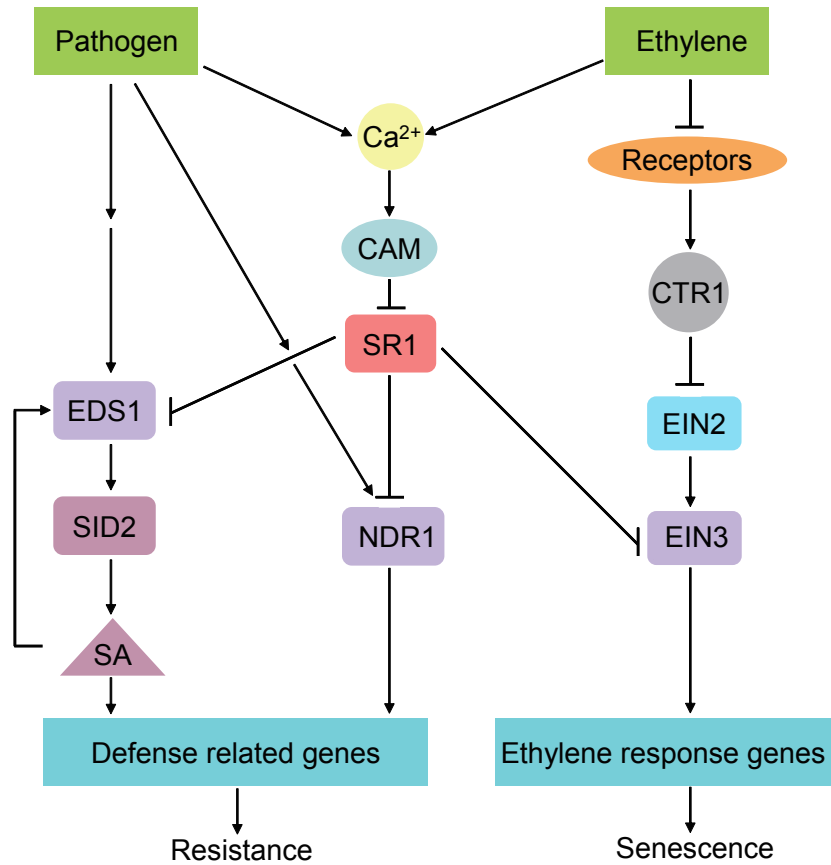

**Supplemental Figure 9.** A model illustrating the role of SR1 in defense responses and senescence. SR1 negatively regulates defense responses and senescence by repressing the expression of *EDS1*, *NDR1* and *EIN3*. The SR1 protein functions at the critical point where plant immunity and ethylene signaling are fine-tuned to reach a well-balanced defense against pathogens.

Table 1 Primers used in this study.

| Primer name      | Sequence(5' to 3')               | Used for        |
|------------------|----------------------------------|-----------------|
| Salk_01152 LP    | TGAAAACCTGATGAATCCGAG            | <i>sr1-1</i>    |
| Salk_01152 RP    | GGTTGTGAAGTGGTGGTAAGC            | <i>sr1-1</i>    |
| Caps-F           | AGTGATGATTCCGTGCAAGGCG           | <i>sr1-4D</i>   |
| Caps-R           | GCACCATTGCCAGTAAAAACCGTT         | <i>sr1-4D</i>   |
| SR1-C-F          | GGATCCTCCAAATAGATAAATAGGGTTC     | Complementation |
| SR1-C-R          | GTCGACCAGTAAGCATCAATAACATTTTCAGG | Complementation |
| NDR1-Gelshift F  | ATTTGGCTAAACGCGTGTGTGCGTGTGTGT   | EMSA            |
| NDR1-Gelshift R  | ACACACACGCACACACGCGTTTAGCCAAAT   | EMSA            |
| NDR1-Gelshift mF | ATTTGGCTAAACGATTGTGTGCGTGTGTGT   | EMSA            |
| NDR1-Gelshift mR | ACACACACGCACACAATCGTTTAGCCAAAT   | EMSA            |
| SR1-Gex F        | CGCGGATCCATGGCGGAAGCAAGACGATT    | EMSA            |
| SR1n-Gex R       | CCGCTCGAGCCGGTAAAAGAAGTAGAAACTC  | EMSA            |
| SR1-RT-F         | ATGGCGGAAGCAAGACGATTCAG          | Real time PCR   |
| SR1-RT-R         | ATCAAACATAAAAACAGACCCACTTG       | Real time PCR   |
| NDR1-RT F        | CTTTTCTTATGGCTTAGTCTCCGTG        | Real time PCR   |
| NDR1-RT R        | ATCTTGGTCGTGTTGATGGTGG           | Real time PCR   |
| Actin8-RT-F      | CGAGGCTCCTCTTAACCCAAA            | Real time PCR   |
| Actin8-RT-R      | GGCACAGTGTGAGACACACCA            | Real time PCR   |
| PR1-RT-F         | AAAGCTCAAGATAGCCCACA             | Real time PCR   |
| PR1-RT-R         | AGCCTTCTCGCTAACCCACA             | Real time PCR   |
| PR2-RT-F         | GAATCAAGGAGCTTAGCCTCAC           | Real time PCR   |
| PR2-RT-R         | GTAGAGCCGCATTCGCTGGAT            | Real time PCR   |
| PR5-RT-F         | GCACAGAGACACACACAAAA             | Real time PCR   |
| PR5-RT-R         | TGTTCTTAGAGTGAAGTCTG             | Real time PCR   |
| SID2-RT-F        | CGCAAGAAGTATGAGTCATGTTCCG        | Real time PCR   |
| SID2-RT-R        | AACCTGTAACCGAACGACGC             | Real time PCR   |
| PAD4-RT-F        | CGGCTTATCCTCCGATGAACCT           | Real time PCR   |
| PAD4-RT-R        | CCAAAGGTGATACAAAAGACGC           | Real time PCR   |
| EDS1-RT-F        | GTCTACGCTCAATGACCTTGGAGTG        | Real time PCR   |
| EDS1-RT-R        | CATTTTTATGGGCTTGACACTTTGG        | Real time PCR   |
| EDS5-RT-F        | GGAACAGATGAAAGAGATAGTGAAG        | Real time PCR   |
| EDS5-RT-R        | GATGTAGCCACGGAGAGGAA             | Real time PCR   |
| EIN3-RT-F        | GACAGAACCGTTTTACCTGCGAGA         | Real time PCR   |
| EIN3-RT-R        | CTGAGGAAATCCAACCTACAGGCTTA       | Real time PCR   |
| SAG12-RT-F       | CTGGTTTCAAAGGTGTCTCGG            | Real time PCR   |
| SAG12-RT-R       | CTGAAAACGCCCAACAACATC            | Real time PCR   |
| SAG24-RT-F       | AATCATGGAGTTCATGCTCAGG           | Real time PCR   |
| SAG24-RT-R       | CAGGCACAATCCTCTTCATCG            | Real time PCR   |
| NDR1 ChIP-F      | TTGGTTCTTTTTGATAACCCAAAAGT       | ChIP            |
| NDR1 ChIP-R      | TTTGGTTTGCTGATTGGTTGATATT        | ChIP            |
| EIN3-ChIP-F      | TAGCACACAATAAATAAACTCCG          | ChIP            |
| EIN3-ChIP-R      | TTACACATAAAAATTTAAGACATCAT       | ChIP            |

|               |                                                                         |             |
|---------------|-------------------------------------------------------------------------|-------------|
| EDS1-ChIP-F   | TGGTTATGCAATTTGGTTTAGCCAA                                               | ChIP        |
| EDS1-ChIP-R   | ACCGAATTA ACTAACTACACCTTCTT                                             | ChIP        |
| ACTIN2-ChIP-F | GATCCTAGTCTTTTAGTGTGCATTC                                               | ChIP        |
| ACTIN2-ChIP-R | ATTAAATGATTGATCGGTTTTTCGTG                                              | ChIP        |
| SR1-AttB1     | ACAAGTTTGTACAAAAAAGCAGGCTTCGAAGGAGATA<br>GAACCATGGCGGAAGCAAGACGATTCAGCC | ChIP        |
| SR1-AttB2     | ACCACTTTGTACAAGAAAGCTGGGTC ACTGGTC<br>CACAAAGATGAGGACATAGGCAACATCAA     | ChIP        |
| SRcam-2401 F  | CGCGGATCCGCTCGGATTCATCAGGTTTTTCAGGGC                                    | CAM binding |
| SRcam-2700 R  | ACGCGTCGACCCAAATTATCTTTCTGTAGTTTTTCCTA                                  | CAM binding |
| SRcam-2880 R  | ACGCGTCGACTGCAAGAGCTTTTTGTAGCCTATCCTCT                                  | CAM binding |

---

## Supplemental Figures

### Supplemental Figure 1. *SRI* was induced by powdery mildew and *Pto* DC3000

Four-week-old plants were inoculated with *G. cichoracearum* or *Pto* DC3000. The relative expression of *SRI* was examined at various time points.

A. *G. cichoracearum*

B. *Pto* DC3000

The bars represent the mean and standard deviation of values from three independent experiments.

### Supplemental Figure 2. *sr1-4D* suppressed *edr1*-mediated powdery mildew resistance

Four-week-old plants were infected with *G. cichoracearum*.

A. The representative leaves were removed and photographed at 8 dpi.

B. Infected leaves were stained with trypan blue to visualize fungal growth and plant cell death. Bar = 100  $\mu$ m.

### Supplemental Figure 3. Temperature dependent growth phenotype of *sr1-4D*

A-B. Wild type, *sr1-4D* and *sr1-1* plants were grown at 25-27°C (A) or 19-21°C (B) for 4-5 weeks. Bar=1 cm

C. Fresh weight of five-week-old plants grown at 19-21°C. The bars represent mean and standard deviation of samples (n=12).

D-F. Relative expression of defense related genes *PR1* (D), *PR2* (E) and *PR5* (F) in 4-5 week old plants grown at 19-21°C. The bars represent the mean and standard deviation of values from three independent experiments.

In C-E, low-case letters indicate statistical significance ( $p < 0.01$ , t-test).

### Supplemental Figure 4. SA accumulation of *sr1-4D*.

A-B. Accumulation of free (A) and Conjugated (B) SA in five-week-old plants grown at 19-21°C.

C-F. Relative expression of *SID2* (C), *PAD4* (D), *EDS1* (E) and *EDS5* (F) in 4-5 week

old plants grown at 19-21 °C.

The bars represent mean and standard deviation of three independent biological samples. Low-case letters indicate statistical significance ( $p < 0.01$ , t-test).

**Supplemental Figure 5.** The *NDR1* promoter sequence contains a CGCG box

**Supplemental Figure 6.** SR1 is involved in ethylene induced senescence, but is not involved in ACC induced triple response.

- A. Four-week-old plants were treated with  $100 \mu\text{l l}^{-1}$  ethylene for 3 days.
- B. Chlorophyll ratio of day 3 over day 0, for the fourth to the sixth leaves treated with  $100 \mu\text{l l}^{-1}$  ethylene. The bars represent mean and standard deviation of values from samples. Statistical differences are indicated with lower-case letters ( $n=4$ ,  $P < 0.01$ , one-way ANOVA). The experiment was repeated 3 times with similar results.
- C. The wild type, *edr2*, *edr2 sr1-4D*, *sr1-4D* and *sr1-1* seeds were plated on 1/2 MS medium with  $5 \mu\text{M}$  ACC for 4 days in dark.

**Supplemental Figure 7.** Relative expression of several defense and senescence related genes.

- A-B. Relative expression of *EIN3* in four-week-old plants. (A) Untreated plants (B) Plants treated with  $100 \mu\text{l l}^{-1}$  ethylene for 3 days. The bars represent mean and standard deviation from three biological replicates. Low-case letters indicate statistical significance ( $p < 0.01$ , t-test).
- C. Relative expression of *SRI* in wild type before and after ethylene treatment (at 0h, 6h and 72h).
- D-E. Relative expression of *SAG12* (D) and *SAG24* (E) in four-week-old plants treated with  $100 \mu\text{l l}^{-1}$  ethylene for 3 days. The bars represent mean and standard deviation from three biological replicates. Low-case letters indicate statistical significance ( $p < 0.01$ , t-test).

**Supplemental Figure 8.** Calcium is needed for SR1-4D binding to the calmodulin *in vitro*. An animal version of calmodulin was used in the experiments.

- A. Calmodulin binding assay performed in the presence of 1mM CaCl<sub>2</sub>.
- B. Calmodulin binding assay performed in the presence of 5mM EGTA
- C. Immunoblot with GST antibody showing the correct size of the expressed protein.
- D. Coomassie brilliant blue (CBB) staining showed the equal loading of each sample.

SR1-N: Truncated SR1 protein (1-146aa)

SR1-C1-GST: Truncated SR1 protein (801-900aa)

SR1-C2-GST: Truncated SR1 protein (801-930aa)

SR1-4D-C1-GST : Truncated SR1-4D protein (801-900aa)

SR1-4D-C2-GST: Truncated SR1-4D protein (801-930aa)

**Supplemental Figure 9.** A model illustrating the role of SR1 in defense responses and senescence. SR1 negatively regulates defense responses and senescence by repressing the expression of *EDS1*, *NDR1* and *EIN3*. The SR1 protein functions at the critical point where plant immunity and ethylene signaling are fine-tuned to reach a well-balanced defense against pathogens.

**Supplemental Table 1.** Primers used in this study.
